# Supplementary material
Source: MDPI journal article supplement (https://www.mdpi.com/2077-1312/9/5/519)
Supplement: s1 [file s1]

| GeoB1710 (cmbsf) | Age (kyr) | Mean Weight ( $\mu\text{g}$ ) | STDEV | Seawater density ( $\text{kg/m}^3$ ) |
|------------------|-----------|-------------------------------|-------|--------------------------------------|
| 0                | 0.00      | 14.1                          | 1.8   | 1026.91                              |
| 8                | 3.40      | 15.5                          | 1.9   | 1027.32                              |
| 18               | 5.25      | 12.8                          | 1.8   | 1026.53                              |
| 28               | 7.00      | 14.3                          | 2.3   | 1026.96                              |
| 38               | 8.67      | 15.7                          | 2.2   | 1027.38                              |
| 48               | 10.34     | 15.5                          | 1.7   | 1027.31                              |
| 58               | 12.02     | 16.5                          | 2.3   | 1027.60                              |
| 68               | 13.72     | 15.6                          | 2.2   | 1027.34                              |
| 78               | 15.43     | 15.1                          | 1.5   | 1027.20                              |
| 88               | 17.08     | 17.3                          | 1.4   | 1027.84                              |
| 98               | 18.65     | 14.0                          | 1.7   | 1026.89                              |
| 107              | 20.15     | 25.4                          | 2.5   | 1030.22                              |
| 128              | 23.00     | 18.2                          | 1.5   | 1028.12                              |
| 138              | 24.43     | 19.5                          | 2.9   | 1028.48                              |
| 148              | 25.86     | 24.3                          | 3.4   | 1029.90                              |
| 158              | 27.29     | 17.8                          | 3.6   | 1028.00                              |
| 168              | 28.83     | 20.8                          | 2.9   | 1028.87                              |
| 178              | 30.50     | 21.0                          | 2.9   | 1028.93                              |
| 188              | 32.17     | 22.9                          | 3.4   | 1029.48                              |
| 198              | 33.84     | 22.5                          | 3.1   | 1029.36                              |
| 207              | 35.34     | 22.5                          | 3.2   | 1029.38                              |
| 218              | 37.17     | 19.0                          | 1.9   | 1028.34                              |
| 228              | 38.83     | 17.9                          | 2.5   | 1028.01                              |
| 238              | 40.50     | 24.9                          | 3.5   | 1030.08                              |
| 268              | 45.50     | 19.5                          | 2.1   | 1028.49                              |
| 278              | 47.17     | 22.8                          | 3.2   | 1029.46                              |
| 288              | 48.84     | 23.5                          | 3.8   | 1029.67                              |
| 298              | 50.50     | 22.7                          | 4.5   | 1029.42                              |
| 308              | 52.17     | 23.4                          | 3.3   | 1029.63                              |
| 318              | 54.00     | 18.9                          | 2.8   | 1028.30                              |
| 328              | 56.00     | 22.1                          | 3.1   | 1029.25                              |
| 338              | 58.10     | 16.7                          | 3.0   | 1027.67                              |
| 348              | 60.30     | 16.2                          | 2.3   | 1027.54                              |
| 358              | 62.55     | 13.2                          | 1.9   | 1026.65                              |
| 368              | 64.85     | 20.6                          | 2.9   | 1028.80                              |
| 378              | 67.00     | 20.1                          | 3.2   | 1028.66                              |
| 388              | 69.00     | 22.2                          | 3.1   | 1029.30                              |
| 398              | 71.00     | 22.5                          | 3.1   | 1029.37                              |
| 407              | 72.80     | 16.7                          | 1.7   | 1027.68                              |
| 418              | 75.00     | 22.5                          | 3.1   | 1029.37                              |
| 428              | 77.06     | 22.4                          | 3.1   | 1029.33                              |
| 438              | 79.17     | 16.6                          | 2.0   | 1027.64                              |
| 448              | 81.28     | 13.0                          | 1.3   | 1026.58                              |
| 458              | 83.50     | 13.7                          | 1.9   | 1026.80                              |
| 468              | 85.83     | 11.3                          | 2.2   | 1026.10                              |
| 478              | 88.33     | 13.3                          | 1.5   | 1026.69                              |

| GeoB1710 (cmbsf) | Age (kyr) | Mean Weight ( $\mu\text{g}$ ) | STDEV | Seawater density ( $\text{kg/m}^3$ ) |
|------------------|-----------|-------------------------------|-------|--------------------------------------|
| 488              | 91.00     | 19.3                          | 2.7   | 1028.45                              |
| 498              | 93.67     | 19.4                          | 2.9   | 1028.47                              |
| 508              | 96.34     | 17.1                          | 2.4   | 1027.79                              |
| 518              | 99.00     | 13.7                          | 1.6   | 1026.78                              |
| 528              | 101.67    | 18.0                          | 2.5   | 1028.06                              |
| 538              | 104.31    | 16.8                          | 2.3   | 1027.70                              |
| 548              | 106.94    | 20.1                          | 2.8   | 1028.65                              |
| 558              | 109.50    | 20.7                          | 1.7   | 1028.85                              |
| 568              | 112.00    | 16.3                          | 2.3   | 1027.56                              |
| 578              | 114.50    | 12.1                          | 1.7   | 1026.34                              |
| 588              | 117.00    | 14.0                          | 2.0   | 1026.88                              |
| 598              | 119.49    | 14.2                          | 1.7   | 1026.95                              |
| 608              | 121.96    | 13.6                          | 1.5   | 1026.76                              |
| 618              | 124.40    | 14.8                          | 1.2   | 1027.11                              |
| 628              | 126.80    | 15.2                          | 1.2   | 1027.23                              |
| 638              | 129.17    | 14.9                          | 1.2   | 1027.13                              |
| 648              | 131.50    | 15.2                          | 2.1   | 1027.23                              |
| 658              | 133.71    | 15.2                          | 2.1   | 1027.25                              |
| 668              | 135.79    | 17.9                          | 2.3   | 1028.03                              |
| 678              | 137.75    | 22.9                          | 3.2   | 1029.48                              |
| 688              | 139.58    | 19.0                          | 2.5   | 1028.34                              |
| 698              | 141.42    | 16.6                          | 2.3   | 1027.63                              |
| 708              | 143.25    | 18.2                          | 3.1   | 1028.13                              |
| 718              | 144.99    | 12.6                          | 1.8   | 1026.48                              |
| 728              | 146.62    | 11.8                          | 1.9   | 1026.24                              |
| 738              | 148.23    | 12.6                          | 1.8   | 1026.46                              |
| 748              | 149.84    | 13.7                          | 1.9   | 1026.78                              |
| 758              | 151.45    | 13.5                          | 2.7   | 1026.73                              |
| 768              | 153.50    | 18.3                          | 2.6   | 1028.14                              |
| 778              | 156.00    | 16.3                          | 2.3   | 1027.55                              |
| 788              | 158.50    | 13.6                          | 1.9   | 1026.78                              |
| 798              | 161.00    | 14.8                          | 2.7   | 1027.10                              |
| 808              | 163.50    | 17.7                          | 2.5   | 1027.96                              |
| 818              | 166.00    | 20.8                          | 2.9   | 1028.88                              |
| 828              | 168.56    | 16.3                          | 2.3   | 1027.56                              |
| 838              | 171.19    | 22.4                          | 4.7   | 1029.36                              |
| 848              | 174.00    | 13.5                          | 1.9   | 1026.72                              |
| 858              | 177.00    | 15.3                          | 2.1   | 1027.26                              |
| 868              | 179.80    | 12.4                          | 1.4   | 1026.40                              |
| 878              | 182.40    | 19.3                          | 3.3   | 1028.44                              |
| 888              | 185.00    | 18.3                          | 2.6   | 1028.14                              |
| 898              | 187.67    | 16.6                          | 2.5   | 1027.66                              |
| 908              | 190.71    | 16.5                          | 2.3   | 1027.61                              |
| 918              | 194.12    | 13.9                          | 1.8   | 1026.85                              |
| 928              | 197.73    | 13.5                          | 1.9   | 1026.74                              |
