# Supplementary material
Source: MDPI journal article supplement (https://www.mdpi.com/2077-1312/9/5/519)
Supplement: s1 [file s1]

SMCE I GeoB 8502

| Sample 75 cmbsf | Test Area (μm <sup>2</sup> ) | Test Volume (μm <sup>3</sup> ) | Test thickness | Dirt Volume (μm <sup>3</sup> ) | Dirt % | Shell Surface Area (μm <sup>2</sup> ) | Shell Volume (μm <sup>3</sup> ) | Protoplasm (μm3) | Test % |
|-----------------|------------------------------|--------------------------------|----------------|--------------------------------|--------|---------------------------------------|---------------------------------|------------------|--------|
| Shell 1         | 1,023,650                    | 5,671,050                      | 5.5            | 2,319,620                      | 10%    | 508,085                               | 22,200,100                      | 16,529,050       | 26%    |
| Shell 2         | 917,406                      | 4,615,540                      | 5.0            | 27,750                         | 0%     | 440,627                               | 19,212,000                      | 14,596,460       | 24%    |
| Shell 3         | 1,013,280                    | 4,953,530                      | 4.9            | 1,242,670                      | 6%     | 497,521                               | 20,742,500                      | 15,788,970       | 24%    |
| Shell 4         | 1,192,700                    | 5,244,630                      | 4.4            | 1,030,060                      | 4%     | 572,246                               | 26,954,300                      | 21,709,670       | 19%    |
| Shell 5         | 842,171                      | 3,350,520                      | 4.0            | 888,003                        | 5%     | 414,938                               | 17,036,000                      | 13,685,480       | 20%    |
| Shell 6         | 992,558                      | 5,654,490                      | 5.7            | 485,031                        | 2%     | 492,870                               | 21,633,000                      | 15,978,510       | 26%    |
| Shell 7         | 914,372                      | 4,976,860                      | 5.4            | 928,489                        | 4%     | 481,934                               | 20,686,100                      | 15,709,240       | 24%    |
| Shell 8         | 1,113,720                    | 6,509,930                      | 5.8            | 863,927                        | 3%     | 533691                                | 25438100                        | 18,928,170       | 24%    |
| Average         | 1,001,232                    | 5,122,069                      | 5.1            | 973,194                        | 4%     | 492,739                               | 21,737,763                      | 16,615,694       | 23%    |
| STDEV           | 113,332                      | 923,540                        | 0.7            | 659,229                        | 0.030  | 49,486                                | 3,200,716                       | 2,560,085        | 0.025  |
| STDEV %         | 11%                          | 18%                            | 13%            | 68%                            | 68%    | 10%                                   | 15%                             | 15%              | 11%    |

SMCE II GeoB

| 8502    | Test Area (μm <sup>2</sup> ) | Test Volume (μm <sup>3</sup> ) | Test thickness | Dirt Volume (μm <sup>3</sup> ) | Dirt % | Shell Surface Area (μm <sup>2</sup> ) | Shell Volume (μm <sup>3</sup> ) | Protoplasm (μm3) | Test % |
|---------|------------------------------|--------------------------------|----------------|--------------------------------|--------|---------------------------------------|---------------------------------|------------------|--------|
| Shell 1 | 973,457                      | 5,319,397                      | 5.5            | 1,486,004                      | 7%     | 459,068                               | 20,133,400                      | 14,814,003       | 26%    |
| Shell 2 | 1,069,520                    | 5,228,296                      | 4.9            | 1,675,260                      | 7%     | 508,790                               | 23,128,400                      | 17,900,104       | 23%    |
| Shell 3 | 988,223                      | 5,014,924                      | 5.1            | 703,674                        | 3%     | 490,928                               | 20,624,600                      | 15,609,676       | 24%    |
| Shell 4 | 1,127,470                    | 5,699,836                      | 5.1            | 2,152,477                      | 9%     | 543,098                               | 25,106,100                      | 19,406,264       | 23%    |
| Shell 5 | 921,172                      | 4,867,658                      | 5.3            | 363,815                        | 2%     | 445,658                               | 18,882,400                      | 14,014,742       | 26%    |
| Shell 6 | 1,126,413                    | 5,548,905                      | 4.9            | 2,203,650                      | 9%     | 546,246                               | 24,397,400                      | 18,848,495       | 23%    |
| Shell 7 | 1,030,054                    | 4,542,654                      | 4.4            | 1,264,516                      | 6%     | 494,570                               | 21,945,300                      | 17,402,646       | 21%    |
| Shell 8 | 1,035,128                    | 5,566,874                      | 5.4            | 306,912                        | 1%     | 486,526                               | 22,689,200                      | 17,122,326       | 25%    |
| Shell 9 | 1,105,755                    | 4,918,244                      | 4.4            | 524,920                        | 2%     | 529365                                | 24028000                        | 19,109,756       | 25%    |
| Average | 1,041,910                    | 5,189,643                      | 5.0            | 1,186,803                      | 5%     | 500,472                               | 22,326,089                      | 17,136,446       | 24%    |
| STDEV   | 72,139                       | 383,480                        | 0.4            | 743,612                        | 0.030  | 35,099                                | 2,103,503                       | 1,939,754        | 0.018  |
| STDEV % | 7%                           | 7%                             | 7%             | 63%                            | 58%    | 7%                                    | 9%                              | 11%              | 7%     |

SMCE I GeoB 1710

| Sample 98 cmbsf | Test Area (μm <sup>2</sup> ) | Test Volume (μm <sup>3</sup> ) | Test thickness | Dirt Volume (μm <sup>3</sup> ) | Dirt % | Shell Surface Area (μm <sup>2</sup> ) | Shell Volume (μm <sup>3</sup> ) | Protoplasm (μm3) | Test % |
|-----------------|------------------------------|--------------------------------|----------------|--------------------------------|--------|---------------------------------------|---------------------------------|------------------|--------|
| Shell 1         | 1,143,070                    | 5,980,290                      | 5.2            | 1,037,560                      | 4%     | 562,636                               | 25,894,200                      | 19,913,910       | 23%    |
| Shell 2         | 971,963                      | 4,454,800                      | 4.6            | 220,230                        | 1%     | 493,400                               | 22,489,600                      | 18,034,800       | 20%    |
| Shell 3         | 1,223,663                    | 5,204,690                      | 4.3            | 323,740                        | 1%     |                                       | 24,082,500                      | 18,877,810       | 22%    |
| Average         | 1,112,899                    | 5,213,260                      | 4.7            | 527,177                        | 2%     | 528,018                               | 24,155,433                      | 18,942,173       | 22%    |
| STDEV           | 128,534                      | 762,781                        | 0.5            | 445,025                        | 0.017  | 48,957                                | 1,703,471                       | 941,207          | 0.016  |
| STDEV %         | 12%                          | 15%                            | 11%            | 84%                            | 78%    | 9%                                    | 7%                              | 5%               | 8%     |

SMCE II GeoB

| 1710    | Test Area (μm <sup>2</sup> ) | Test Volume (μm <sup>3</sup> ) | Test thickness | Dirt Volume (μm <sup>3</sup> ) | Dirt % | Shell Surface Area (μm <sup>2</sup> ) | Shell Volume (μm <sup>3</sup> ) | Protoplasm (μm3) | Test % |
|---------|------------------------------|--------------------------------|----------------|--------------------------------|--------|---------------------------------------|---------------------------------|------------------|--------|
| Shell 1 | 898,398                      | 5,119,320                      | 5.7            | 314,734                        | 2%     | 440,939                               | 18,652,200                      | 13,532,880       | 27%    |
| Shell 2 | 910,809                      | 3,914,350                      | 4.3            | 1,137,780                      | 6%     | 435,414                               | 19,212,100                      | 15,297,750       | 20%    |
| Shell 3 | 1,106,380                    | 5,689,410                      | 5.1            | 37,529                         | 0%     | 535,417                               | 25,245,900                      | 19,556,490       | 23%    |
| Shell 4 | 1,061,990                    | 6,214,080                      | 5.9            | 25,718                         | 0%     | 527,452                               | 22,900,900                      | 16,686,820       | 27%    |
| Shell 5 | 967,795                      | 4,829,610                      | 5.0            | 3,836,760                      | 19%    | 461,121                               | 20,390,100                      | 15,560,490       | 24%    |
| Shell 6 | 988,324                      | 5,440,200                      | 5.5            | 749,144                        | 4%     | 495,416                               | 20,948,000                      | 15,507,800       | 26%    |
| Shell 7 | 1,023,650                    | 5,671,050                      | 5.5            | 2,319,620                      | 10%    | 508,085                               | 22,200,100                      | 16,529,050       | 26%    |
| Shell 8 | 963,380                      | 4,527,640                      | 4.7            | 2,744,780                      | 14%    | 488,172                               | 20,059,000                      | 15,531,360       | 23%    |
| Shell 9 | 1,024,790                    | 5,612,170                      | 5.5            | 2,187,190                      | 10%    | 502240                                | 21826900                        | 16,214,730       | 23%    |
| Average | 993,946                      | 5,224,203                      | 5.2            | 1,483,695                      | 7%     | 488,251                               | 21,270,578                      | 16,046,374       | 24%    |
| STDEV   | 67,820                       | 703,628                        | 0.5            | 1,349,246                      | 0.065  | 35,651                                | 2,033,319                       | 1,607,089        | 0.024  |
| STDEV % | 7%                           | 13%                            | 10%            | 91%                            | 91%    | 7%                                    | 10%                             | 10%              | 10%    |

LGM GeoB 1710

| Sample 107 cmbsf | Test Area (μm <sup>2</sup> ) | Test Volume (μm <sup>3</sup> ) | Test thickness | Dirt Volume (μm <sup>3</sup> ) | Dirt % | Shell Surface Area (μm <sup>2</sup> ) | Shell Volume (μm <sup>3</sup> ) | Protoplasm (μm3) | Test % |
|------------------|------------------------------|--------------------------------|----------------|--------------------------------|--------|---------------------------------------|---------------------------------|------------------|--------|
| Shell 1          | 1,065,790                    | 12,164,000                     | 11.4           | 2,710,330                      | 10%    | 603,561                               | 27,696,500                      | 15,532,500       | 44%    |
| Shell 2          | 1,020,900                    | 10,675,900                     | 10.5           | 1,656,840                      | 6%     | 580,607                               | 26,737,300                      | 16,061,400       | 40%    |
| Shell 3          | 983,094                      | 10,438,700                     | 10.6           | 2,290,350                      | 9%     | 573,274                               | 25,502,100                      | 15,063,400       | 41%    |
| Shell 4          | 1,019,810                    | 10,217,100                     | 10.0           | 680,726                        | 3%     | 551,082                               | 24,839,300                      | 14,622,200       | 41%    |
| Shell 5          | 1,045,580                    | 11,902,800                     | 11.4           | 690,582                        | 2%     | 571,351                               | 28,314,300                      | 16,411,500       | 42%    |
| Shell 6          | 1,041,610                    | 12,551,700                     | 12.1           | 1,157,330                      | 4%     | 600,994                               | 29,442,200                      | 16,890,500       | 43%    |
| Average          | 1,029,464                    | 11,325,033                     | 11.0           | 1,531,026                      | 6%     | 580,145                               | 27,088,617                      | 15,763,583       | 42%    |
| STDEV            | 28,438                       | 997,684                        | 0.8            | 842,872                        | 0.032  | 19,761                                | 1,738,451                       | 851,451          | 0.014  |
| STDEV %          | 3%                           | 9%                             | 7%             | 55%                            | 56%    | 3%                                    | 6%                              | 5%               | 3%     |
